# Supplementary material for: Improving the Evaluation of Adult Mental Disorders in the Criminal Justice System With Computerized Adaptive Testing
Source: Atypon-hosted journal article supplement (doi:10.1176/appi.ps.201900038), 2019-07-24
Supplement: appi.ps.201900038.ds001.pdf [file appi.ps.201900038.ds001.pdf]

**SUPPLEMENTAL MATERIALS****Supplemental Table 1. Score Distributions**

| <b>CAT/CAD</b>                                          | <b>Category</b>   | <b>Frequency</b> | <b>Percent</b> |
|---------------------------------------------------------|-------------------|------------------|----------------|
| <b>Major Depressive Disorder<br/>Screener - CAD-MDD</b> |                   |                  |                |
|                                                         | Negative          | 333              | 70%            |
|                                                         | Positive          | 142              | 30%            |
| <b>Depression Severity - CAT-DI</b>                     |                   |                  |                |
|                                                         | Normal            | 376              | 79%            |
|                                                         | Mild              | 56               | 12%            |
|                                                         | Moderate          | 21               | 4%             |
|                                                         | Severe            | 22               | 5%             |
| <b>Anxiety Severity - CAT-ANX</b>                       |                   |                  |                |
|                                                         | Normal            | 323              | 68%            |
|                                                         | Mild              | 64               | 14%            |
|                                                         | Moderate          | 45               | 10%            |
|                                                         | Severe            | 43               | 9%             |
| <b>Mania/Hypomania Severity<br/>CAT-MANIA</b>           |                   |                  |                |
|                                                         | Normal            | 302              | 64%            |
|                                                         | Mild              | 92               | 19%            |
|                                                         | Moderate          | 33               | 7%             |
|                                                         | Severe            | 48               | 10%            |
| <b>Suicidality - CAT-SS</b>                             |                   |                  |                |
|                                                         | Low Risk          | 335              | 71%            |
|                                                         | Intermediate Risk | 124              | 26%            |
|                                                         | High Risk         | 16               | 3%             |
| <b>Substance Abuse - CAT-SA</b>                         |                   |                  |                |
|                                                         | Low Risk          | 306              | 64%            |
|                                                         | Intermediate Risk | 104              | 22%            |
|                                                         | High Risk         | 65               | 14%            |

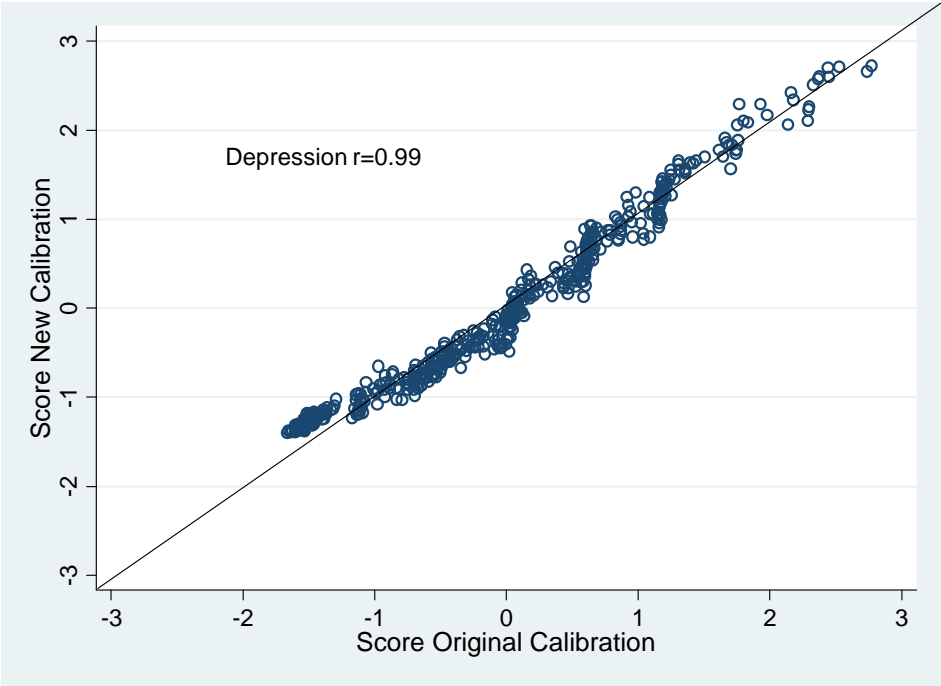

**Supplemental Figure 1: Depression – Comparison of Original Psychiatric and Bond Court Calibrations**

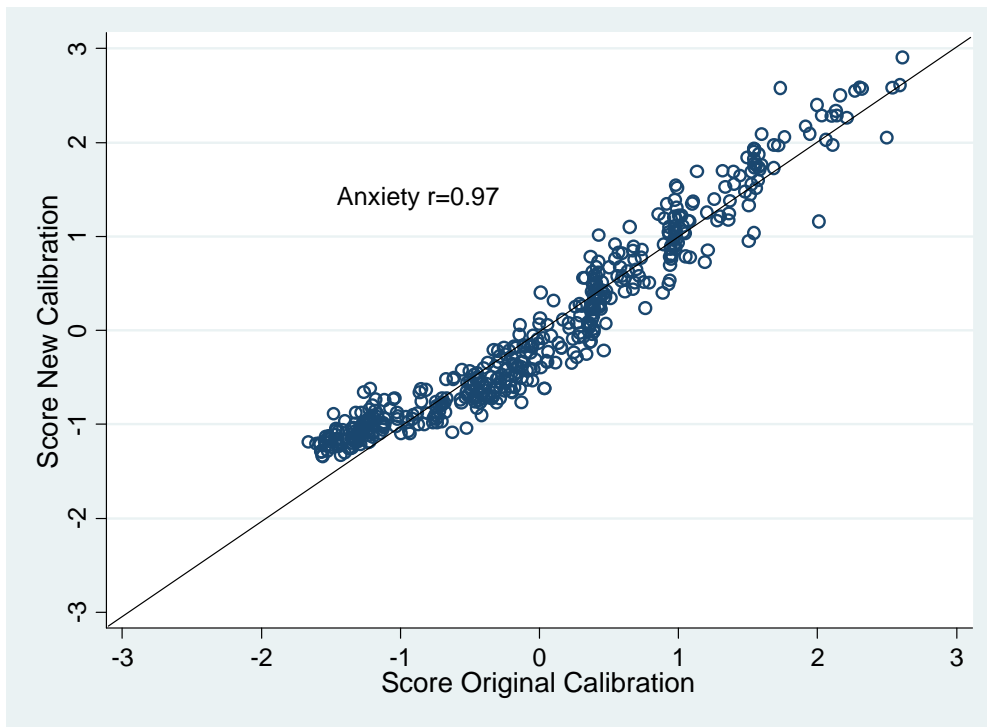

**Supplemental Figure 2: Anxiety – Comparison of Original Psychiatric and Bond Court Calibrations**

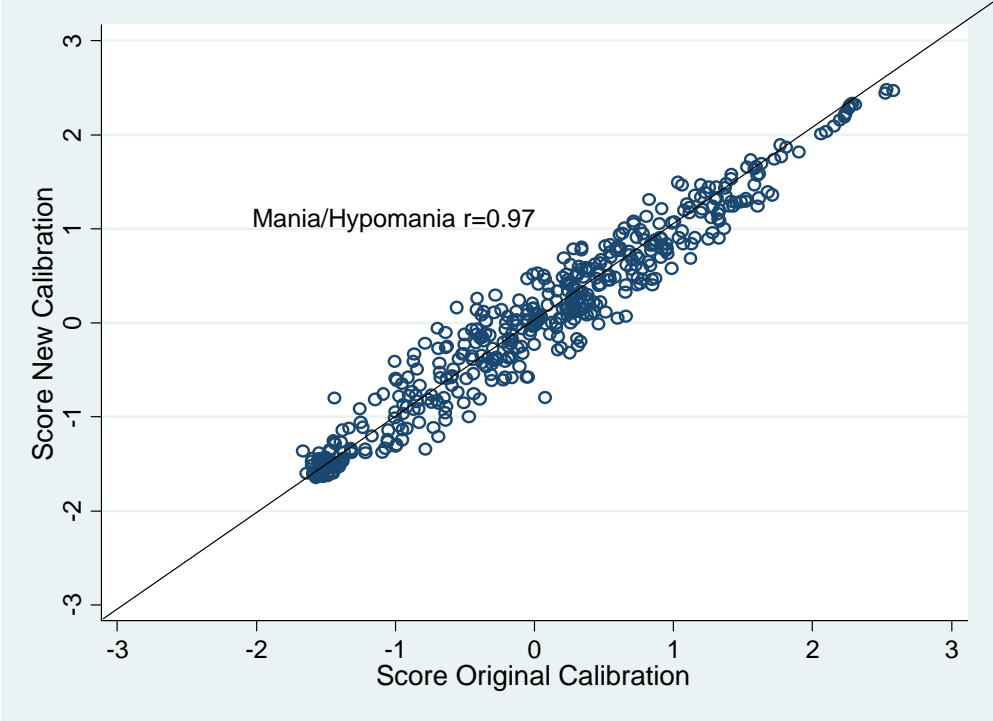

**Supplemental Figure 3: Mania/Hypomania – Comparison of Original Psychiatric and Bond Court Calibrations**

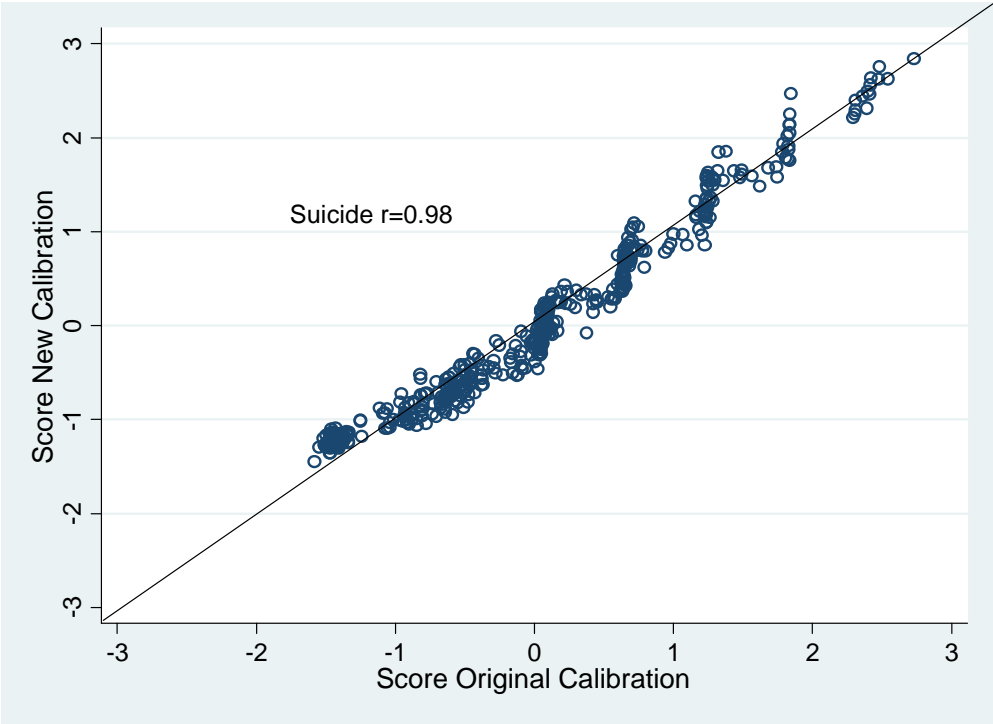

**Supplemental Figure 4: Suicidality – Comparison of Original Psychiatric and Bond Court Calibrations**

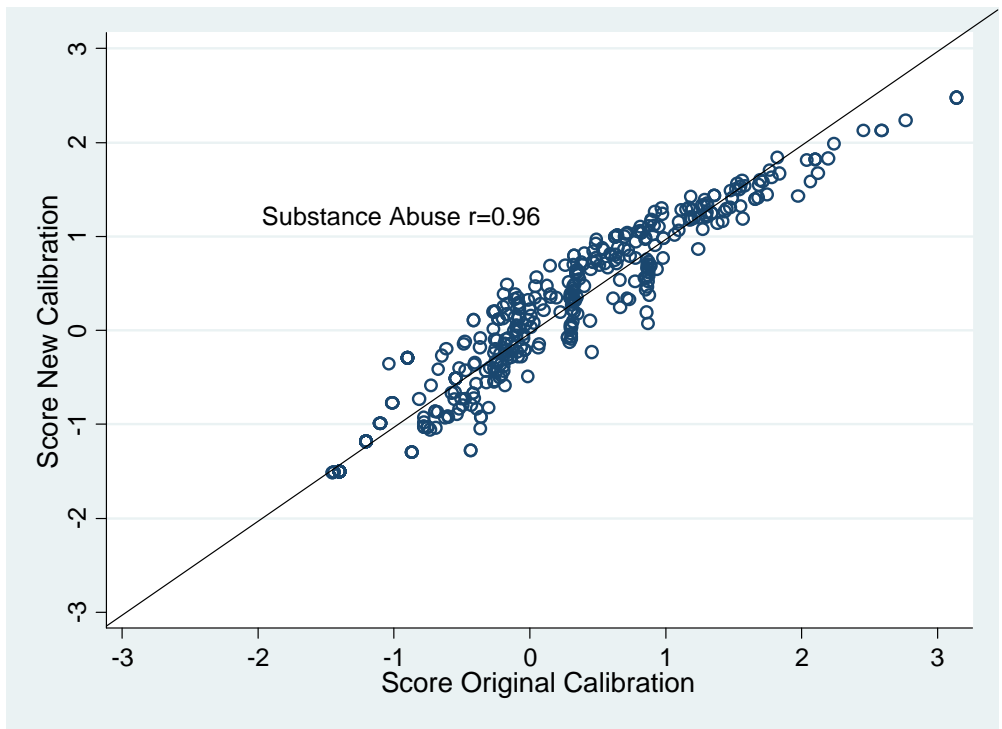

**Supplemental Figure 5: Substance Abuse – Comparison of Original Psychiatric and Bond Court Calibrations**
